# Supplementary material for: SNX4 in Complex with Clathrin and Dynein: Implications for Endosome Movement
Source: PubMed Central journal article supplement (PMC2691479; doi:10.1371/journal.pone.0005935), 2009-06-16

# Figure S3

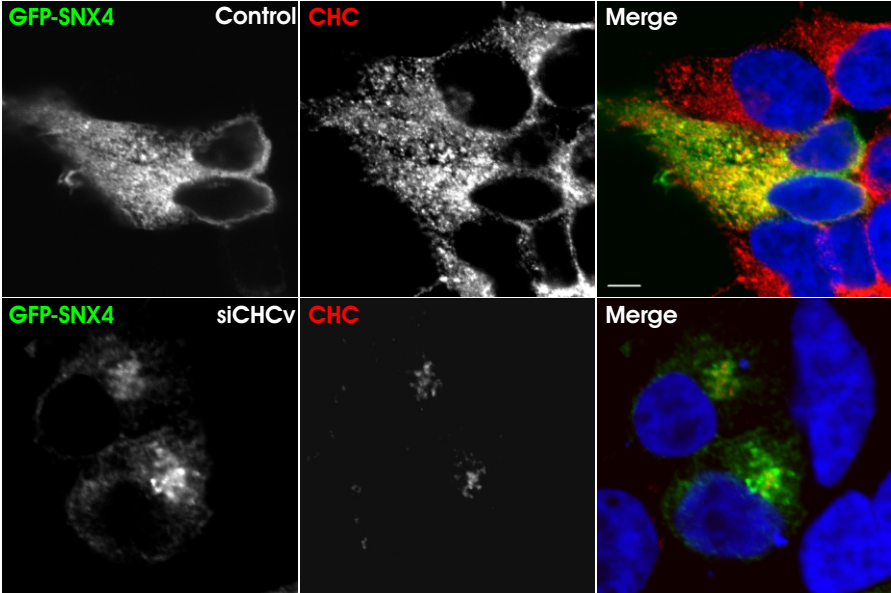

Supplement: pone.0005935.s004.pdf [file pone.0005935.s004.pdf]
